# Supplementary material for: Prevalence and disparities in sexual and reproductive health of women of reproductive age (20–49 years) in China: A national cross-sectional study
Source: PubMed Central journal article supplement (PMC11414425; doi:10.7189/jogh.14.04149), 2024-09-20
Supplement: jogh-14-04149-s001.pdf [file jogh-14-04149-s001.pdf]

**Title: Prevalence and disparities in sexual and reproductive health of women of reproductive age (20-49 years) in China: a national cross-sectional study**

**Online Supplementary Document (OSD)**

**Table S1 Regions of China by Human Developmental Index (HDI)**

| <b>HDI</b>   | <b>Percentile of the HDI</b> | <b>HDI thresholds</b> | <b>City/Regions</b>                                                      |
|--------------|------------------------------|-----------------------|--------------------------------------------------------------------------|
| Very low     | ≤10th                        | ≤ 0.667               | Guizhou Qinghai Xizang Yunnan                                            |
| Low          | >10th to 25th                | (0.667–0.708]         | Anhui Gansu Guangxi Sichuan<br>Hainan Hebei Henan Heilongjiang           |
| Low middle   | >25th to 50th                | (0.708–0.733]         | Jiangxi Ningxia Shanxi<br>Xinjiang                                       |
| Upper middle | >50th to 75th                | (0.733–0.754]         | Fujian Hubei Hunan Jilin Inner-<br>Mongolia Shandong Shanxi<br>Chongqing |
| High         | >75th to 90th                | (0.754–0.784]         | Guangdong Jiangsu Liaoning Zhejiang                                      |
| Very high    | >90th                        | > 0.784               | Beijing Shanghai Tianjin                                                 |

**Table S2 Post-stratification and standardized population of China**

| <b>HDI Regions</b>      | <b>Female age</b> | <b>Study participants</b> | <b>Standardized population</b> |
|-------------------------|-------------------|---------------------------|--------------------------------|
| <b>Very Low HDI</b>     | 20-24             | 139                       | 3060422                        |
|                         | 25-29             | 307                       | 3085817                        |
|                         | 30-34             | 359                       | 3510969                        |
|                         | 35-39             | 242                       | 2965491                        |
|                         | 40-44             | 213                       | 3228393                        |
|                         | 45-49             | 147                       | 3778298                        |
| <b>Low HDI</b>          | 20-24             | 44                        | 5524121                        |
|                         | 25-29             | 88                        | 6743278                        |
|                         | 30-34             | 101                       | 8396849                        |
|                         | 35-39             | 74                        | 6517851                        |
|                         | 40-44             | 92                        | 6568986                        |
|                         | 45-49             | 116                       | 9248918                        |
| <b>Lower-middle HDI</b> | 20-24             | 139                       | 7798831                        |
|                         | 25-29             | 590                       | 9579504                        |
|                         | 30-34             | 787                       | 14046276                       |
|                         | 35-39             | 668                       | 11021543                       |
|                         | 40-44             | 554                       | 10512699                       |
|                         | 45-49             | 454                       | 12728073                       |
| <b>Upper-middle HDI</b> | 20-24             | 34                        | 8685809                        |
|                         | 25-29             | 281                       | 10594608                       |
|                         | 30-34             | 453                       | 16673488                       |
|                         | 35-39             | 412                       | 13005747                       |
|                         | 40-44             | 321                       | 12048838                       |
|                         | 45-49             | 176                       | 15714328                       |
| <b>High HDI</b>         | 20-24             | 80                        | 8493448                        |
|                         | 25-29             | 315                       | 11310018                       |
|                         | 30-34             | 495                       | 14515333                       |
|                         | 35-39             | 596                       | 11877401                       |
|                         | 40-44             | 579                       | 10867683                       |
|                         | 45-49             | 602                       | 12462191                       |
| <b>Very high HDI</b>    | 20-24             | 93                        | 1703049                        |
|                         | 25-29             | 379                       | 2371837                        |
|                         | 30-34             | 818                       | 3130467                        |
|                         | 35-39             | 736                       | 2692862                        |
|                         | 40-44             | 623                       | 2096037                        |
|                         | 45-49             | 708                       | 2101393                        |

**Table S3 Basic characteristics of participants**

| <b>Characteristics</b>                           | <b>Sample Size (n)</b> | <b>Proportion (%)</b> |
|--------------------------------------------------|------------------------|-----------------------|
| <b>All</b>                                       | <b>12,815</b>          | <b>100.0</b>          |
| <b>Maternal age</b>                              |                        |                       |
| Mean (SD)                                        | 36.77 (7.13)           |                       |
| Median (IQR)                                     | 36.0 (31.0-42.0)       |                       |
| 20-24                                            | 518                    | 4.0                   |
| 25-29                                            | 1944                   | 15.2                  |
| 30-34                                            | 3017                   | 23.5                  |
| 35-39                                            | 2731                   | 21.3                  |
| 40-44                                            | 2383                   | 18.6                  |
| 45-49                                            | 2222                   | 17.3                  |
| <b>Body Mass Index (kg/m<sup>2</sup>)</b>        |                        |                       |
| Mean (SD)                                        | 23.2 (4.1)             |                       |
| <18.5                                            | 734                    | 5.7                   |
| 18.5-23.9                                        | 7528                   | 58.7                  |
| 24.0-27.9                                        | 3220                   | 25.1                  |
| ≥28.0                                            | 1192                   | 9.3                   |
| Missing                                          | 141                    | 1.1                   |
| <b>Maternal ethnicity</b>                        |                        |                       |
| Han                                              | 12033                  | 93.8                  |
| Other minorities                                 | 782                    | 6.2                   |
| <b>Educational level</b>                         |                        |                       |
| Primary/junior/high school education             | 5449                   | 43.4                  |
| College or higher education                      | 7223                   | 55.5                  |
| Missing                                          | 143                    | 1.1                   |
| <b>Annual household income per capital (RMB)</b> |                        |                       |
| <10,000                                          | 2354                   | 18.4                  |
| 10,000~20,000                                    | 2143                   | 16.7                  |
| 20,000~30,000                                    | 1968                   | 15.4                  |
| 20,000~50,000                                    | 2581                   | 20.1                  |
| > 50,000                                         | 3593                   | 28.0                  |
| Missing                                          | 176                    | 1.4                   |
| <b>Household registration</b>                    |                        |                       |
| Urban citizens                                   | 6974                   | 54.1                  |
| Rural citizens                                   | 5883                   | 45.9                  |
| <b>Insurance type</b>                            |                        |                       |
| Social and medical insurance                     | 11908                  | 92.9                  |
| Commercial medical insurance                     | 135                    | 1.1                   |
| None insurance                                   | 606                    | 4.7                   |

|                            |      |      |
|----------------------------|------|------|
| NA                         | 166  | 1·3  |
| <b>Geographic location</b> |      |      |
| Southeast                  | 4127 | 32·2 |
| Southwest                  | 1922 | 15·0 |
| Central                    | 5974 | 46·6 |
| Northeast                  | 792  | 6·2  |
| <b>HDI</b>                 |      |      |
| Very high                  | 3357 | 26·2 |
| High                       | 2667 | 20·8 |
| Upper middle               | 1677 | 13·1 |
| Low middle                 | 3192 | 24·9 |
| Low                        | 515  | 4·0  |
| Very low                   | 1407 | 11·0 |

---

**Table S4 Prevalence estimates of gynecological diseases and STDs by HDI in women aged 20-49 years in 2020 CFSW: Overall population**

|                                         | <b>Overall</b><br>% (95%CI) | <b>Very low</b><br>% (95%CI) | <b>Low</b><br>% (95%CI) | <b>Lower middle</b><br>% (95%CI) | <b>Upper middle</b><br>% (95%CI) | <b>High</b><br>% (95%CI) | <b>Very high</b><br>% (95%CI) |
|-----------------------------------------|-----------------------------|------------------------------|-------------------------|----------------------------------|----------------------------------|--------------------------|-------------------------------|
| <b>Gynecological diseases</b>           |                             |                              |                         |                                  |                                  |                          |                               |
| Overall                                 | 49.41 (47.74-51.21)         | 47.65 (43.88-51.72)          | 39.30 (34.12-45.16)     | 44.50 (42.10-47.07)              | 54.48 (50.30-59.22)              | 56.11 (53.11-59.36)      | 44.98 (42.66-47.50)           |
| Vulvovaginitis                          | 31.63 (30.30-33.10)         | 26.63 (23.87-29.67)          | 25.60 (21.45-30.44)     | 25.18 (23.39-27.13)              | 33.83 (30.57-37.65)              | 41.18 (38.62-44.00)      | 28.05 (26.17-30.14)           |
| Cervicitis                              | 20.62 (19.58-21.80)         | 21.75 (19.18-24.62)          | 13.40 (10.46-17.04)     | 16.90 (15.45-18.50)              | 22.70 (20.04-25.93)              | 27.04 (25.11-29.22)      | 15.45 (14.17-16.94)           |
| Pelvic infection diseases               | 13.17 (12.35-14.11)         | 14.45 (12.41-16.79)          | 11.31 (8.64-14.68)      | 13.11 (11.81-14.57)              | 12.14 (10.32-14.55)              | 15.73 (14.24-17.47)      | 10.28 (9.20-11.59)            |
| Uterine myoma                           | 8.23 (7.59-9.01)            | 5.27 (3.99-6.88)             | 3.67 (2.24-5.85)        | 5.34 (4.52-6.32)                 | 10.77 (9.03-13.12)               | 11.76 (10.55-13.22)      | 8.44 (7.54-9.56)              |
| Diminished ovarian reserve              | 2.70 (2.33-3.23)            | 5.92 (4.66-7.50)             | 1.14 (0.42-2.69)        | 2.97 (2.38-3.73)                 | 3.05 (2.10-4.71)                 | 2.35 (1.72-3.30)         | 1.54 (1.17-2.17)              |
| Endometriosis                           | 2.44 (2.11-2.92)            | 3.27 (2.32-4.56)             | 1.67 (0.76-3.37)        | 2.26 (1.76-2.92)                 | 2.73 (1.98-4.20)                 | 2.48 (1.88-3.38)         | 2.67 (2.14-3.44)              |
| Genital malformation                    | 0.29 (0.16-0.64)            | 0.41 (0.13-1.06)             | 0.19 (0.00-1.37)        | 0.08 (0.02-0.41)                 | 0.31 (0.09-1.54)                 | 0.53 (0.17-1.33)         | 0.11 (0.03-0.59)              |
| Genital tuberculosis                    | 0.22 (0.11-0.56)            | 0.32 (0.06-1.02)             | 0.19 (0.00-1.35)        | 0.08 (0.02-0.40)                 | 0.17 (0.02-1.40)                 | 0.43 (0.15-1.13)         | 0.07 (0.01-0.54)              |
| <b>STD</b>                              |                             |                              |                         |                                  |                                  |                          |                               |
| Overall                                 | 2.23 (1.93-2.69)            | 1.56 (0.94-2.51)             | 0.37 (0.04-1.63)        | 1.54 (1.10-2.16)                 | 1.52 (0.98-2.85)                 | 5.33 (4.44-6.50)         | 0.60 (0.37-1.14)              |
| Mycoplasma genitalium infection         | 1.67 (1.43-2.08)            | 1.21 (0.66-2.12)             | 0.19 (0.00-1.37)        | 1.02 (0.67-1.56)                 | 0.80 (0.47-2.01)                 | 4.60 (3.80-5.68)         | 0.25 (0.11-0.74)              |
| Condyloma acuminatum                    | 0.27 (0.15-0.61)            | 0.24 (0.04-0.86)             | 0.18 (0.00-1.34)        | 0.19 (0.05-0.58)                 | 0.26 (0.06-1.49)                 | 0.41 (0.13-1.13)         | 0.23 (0.10-0.72)              |
| Syphilis                                | 0.20 (0.10-0.54)            | 0.18 (0.02-0.79)             | 0.00 (NaN)              | 0.11 (0.03-0.44)                 | 0.21 (0.04-1.44)                 | 0.44 (0.15-1.15)         | 0.07 (0.01-0.55)              |
| Chlamydia trachomatis genital infection | 0.28 (0.16-0.62)            | 0.23 (0.04-0.84)             | 0.00 (NaN)              | 0.36 (0.14-0.82)                 | 0.13 (0.03-1.33)                 | 0.58 (0.21-1.38)         | 0.09 (0.02-0.57)              |
| Toxoplasma gondii and cytomegalovirus   | 0.14 (0.07-0.47)            | 0.26 (0.05-0.89)             | 0.00 (NaN)              | 0.10 (0.02-0.43)                 | 0.09 (0.01-1.30)                 | 0.32 (0.07-1.02)         | 0.10 (0.03-0.57)              |
| Genital herpes                          | 0.14 (0.05-0.47)            | 0.13 (0.00-0.73)             | 0.00 (NaN)              | 0.08 (0.02-0.40)                 | 0.16 (0.01-1.39)                 | 0.29 (0.06-0.99)         | 0.05 (0.01-0.52)              |
| Gonorrhoea                              | 0.13 (0.04-0.47)            | 0.13 (0.00-0.73)             | 0.00 (NaN)              | 0.05 (0.01-0.37)                 | 0.05 (0.00-1.27)                 | 0.40 (0.09-1.20)         | 0.02 (0.00-0.50)              |

**Table S5 Prevalence estimates of gynecological diseases and STDs by HDI in women aged 20-49 years in 2020 CFSW: Population in Urban areas**

|                                         | <b>Overall</b><br><b>%(95%CI)</b> | <b>Very low</b><br><b>%(95%CI)</b> | <b>Low</b><br><b>%(95%CI)</b> | <b>Lower middle</b><br><b>%(95%CI)</b> | <b>Upper-middle</b><br><b>%(95%CI)</b> | <b>High</b><br><b>%(95%CI)</b> | <b>Very-high</b><br><b>%(95%CI)</b> |
|-----------------------------------------|-----------------------------------|------------------------------------|-------------------------------|----------------------------------------|----------------------------------------|--------------------------------|-------------------------------------|
| <b>Gynecological diseases</b>           |                                   |                                    |                               |                                        |                                        |                                |                                     |
| Overall                                 | 48.49 (45.91-51.44)               | 48.57 (43.87-54.19)                | 39.72 (31.02-51.64)           | 44.25 (40.66-48.43)                    | 56.05 (49.78-63.91)                    | 50.40 (45.98-55.42)            | 44.30 (41.39-47.57)                 |
| Vulvovaginitis                          | 29.08 (27.00-31.55)               | 27.68 (24.23-32.08)                | 26.24 (19.02-36.87)           | 24.66 (22.07-27.86)                    | 33.83 (28.8-40.54)                     | 30.70 (27.19-34.86)            | 26.5 (24.19-29.18)                  |
| Cervicitis                              | 18.47 (16.97-20.36)               | 21.49 (18.35-25.61)                | 9.26 (5.64-16.60)             | 16.72 (14.58-19.49)                    | 24.31 (20.3-30.03)                     | 19.31 (16.73-22.53)            | 14.56 (13.00-16.48)                 |
| Pelvic infection diseases               | 11.59 (10.47-13.12)               | 13.16 (10.8-16.54)                 | 12.10 (7.89-19.89)            | 12.29 (10.49-14.74)                    | 10.08 (7.96-14.11)                     | 12.49 (10.44-15.20)            | 8.37 (7.10-10.04)                   |
| Uterine myoma                           | 8.84 (7.81-10.29)                 | 5.98 (4.49-8.61)                   | 5.64 (2.90-12.38)             | 6.04 (4.80-8.00)                       | 12.73 (10.08-17.24)                    | 9.84 (7.97-12.41)              | 9.40 (8.15-11.05)                   |
| Diminished ovarian reserve              | 3.13 (2.58-4.19)                  | 6.55 (4.81-9.44)                   | 2.21 (0.72-8.31)              | 2.72 (1.80-4.46)                       | 3.17 (2.05-6.62)                       | 3.39 (2.33-5.23)               | 1.66 (1.19-2.63)                    |
| Endometriosis                           | 3.21 (2.65-4.26)                  | 4.55 (3.02-7.3)                    | 2.71 (0.99-8.89)              | 2.69 (1.98-4.20)                       | 3.40 (2.27-6.84)                       | 3.43 (2.35-5.29)               | 3.12 (2.36-4.34)                    |
| Genital malformation                    | 0.30 (0.10-1.22)                  | 0.51 (0.16-2.53)                   | 0.00 (NaN)                    | 0.04 (0.00-1.40)                       | 0.00 (NaN)                             | 1.03 (0.26-2.90)               | 0.11 (0.01-0.95)                    |
| Genital tuberculosis                    | 0.28 (0.10-1.19)                  | 0.38 (0.07-2.43)                   | 0.00 (NaN)                    | 0.15 (0.03-1.49)                       | 0.22 (0.01-3.68)                       | 0.66 (0.13-2.29)               | 0.00 (NaN)                          |
| <b>STD</b>                              |                                   |                                    |                               |                                        |                                        |                                |                                     |
| Overall                                 | 1.52 (1.13-2.47)                  | 1.45 (0.80-3.54)                   | 0.42 (0.01-6.32)              | 1.01 (0.59-2.37)                       | 1.65 (0.89-5.01)                       | 2.72 (1.62-4.68)               | 0.67 (0.37-1.54)                    |
| Mycoplasma genitalium infection         | 0.94 (0.65-1.84)                  | 1.04 (0.48-3.1)                    | 0.42 (0.01-6.32)              | 0.69 (0.35-2.04)                       | 0.70 (0.30-4.03)                       | 1.85 (1.01-3.57)               | 0.30 (0.12-1.14)                    |
| Condyloma acuminatum                    | 0.36 (0.16-1.27)                  | 0.35 (0.07-2.38)                   | 0.00 (NaN)                    | 0.15 (0.03-1.49)                       | 0.51 (0.12-3.92)                       | 0.66 (0.13-2.29)               | 0.19 (0.05-1.02)                    |
| Syphilis                                | 0.24 (0.08-1.14)                  | 0.15 (0.00-2.20)                   | 0.00 (NaN)                    | 0.10 (0.01-1.45)                       | 0.09 (0.00-3.54)                       | 0.72 (0.17-2.36)               | 0.07 (0.00-0.91)                    |
| Chlamydia trachomatis genital infection | 0.28 (0.12-1.18)                  | 0.30 (0.05-2.33)                   | 0.00 (NaN)                    | 0.12 (0.01-1.47)                       | 0.13 (0.02-3.57)                       | 0.79 (0.21-2.42)               | 0.10 (0.01-0.94)                    |
| Toxoplasma gondii and cytomegalovirus   | 0.21 (0.06-1.12)                  | 0.22 (0.02-2.26)                   | 0.00 (NaN)                    | 0.06 (0.00-1.42)                       | 0.17 (0.02-3.60)                       | 0.53 (0.06-2.17)               | 0.08 (0.01-0.91)                    |
| Genital herpes                          | 0.23 (0.07-1.15)                  | 0.15 (0.00-2.20)                   | 0.00 (NaN)                    | 0.07 (0.00-1.43)                       | 0.29 (0.02-3.73)                       | 0.53 (0.06-2.17)               | 0.04 (0.00-0.87)                    |
| Gonorrhea                               | 0.24 (0.06-1.17)                  | 0.15 (0.00-2.20)                   | 0.00 (NaN)                    | 0.06 (0.00-1.42)                       | 0.00 (NaN)                             | 0.89 (0.18-2.77)               | 0.00 (NaN)                          |

**Table S6 Prevalence estimates of gynecological diseases and STDs by HDI in women aged 20-49 years in 2020 CFSW: Population in rural areas**

|                                         | <b>Overall</b><br><b>%(95%CI)</b> | <b>Very low</b><br><b>%(95%CI)</b> | <b>Low</b><br><b>%(95%CI)</b> | <b>Lower middle</b><br><b>%(95%CI)</b> | <b>Upper-middle</b><br><b>%(95%CI)</b> | <b>High</b><br><b>%(95%CI)</b> | <b>Very-high</b><br><b>%(95%CI)</b> |
|-----------------------------------------|-----------------------------------|------------------------------------|-------------------------------|----------------------------------------|----------------------------------------|--------------------------------|-------------------------------------|
| <b>Gynecological diseases</b>           |                                   |                                    |                               |                                        |                                        |                                |                                     |
| Overall                                 | 49.48 (46.86-51.74)               | 44.85 (36.25-55.58)                | 39.48 (32.85-47.13)           | 43.20 (39.77-46.91)                    | 52.11 (46.49-58.76)                    | 59.42 (55.24-64.06)            | 46.26 (42.34-50.7)                  |
| Vulvovaginitis                          | 32.77 (30.95-34.82)               | 22.42 (16.75-30.26)                | 25.56 (20.32-31.82)           | 25.06 (22.49-27.89)                    | 33.28 (29.02-38.57)                    | 47.27 (43.64-51.37)            | 30.74(27.46-34.57)                  |
| Cervicitis                              | 21.81 (20.29-23.57)               | 22.17 (16.03-30.61)                | 15.83 (11.78-20.92)           | 16.51 (14.42-18.87)                    | 20.96 (17.34-25.71)                    | 32.29 (29.47-35.57)            | 17.08(14.83-19.89)                  |
| Pelvic infection diseases               | 14.59 (13.36-16.07)               | 18.60 (12.94-26.61)                | 10.80 (7.48-15.17)            | 13.34 (11.46-15.5)                     | 13.98 (11.18-17.92)                    | 17.84 (15.69-20.48)            | 13.65(11.62-16.25)                  |
| Uterine myoma                           | 7.01 (6.23-8.05)                  | 1.38 (0.41-5.28)                   | 2.33 (0.99-4.78)              | 4.42 (3.25-5.91)                       | 8.64 (6.56-11.91)                      | 12.12 (10.64-14.06)            | 7.08 (5.81-8.91)                    |
| Diminished ovarian reserve              | 2.34 (1.82-3.18)                  | 5.60 (2.78-11.02)                  | 0.25 (0.01-1.79)              | 3.28 (2.41-4.43)                       | 2.82 (1.5-5.59)                        | 1.50 (0.80-2.89)               | 1.42 (0.83-2.75)                    |
| Endometriosis                           | 1.49 (1.14-2.16)                  | 0.34 (0.06-3.99)                   | 0.81 (0.17-2.64)              | 1.50 (0.94-2.35)                       | 1.87 (1.02-4.21)                       | 1.63 (1.05-2.85)               | 2.23 (1.49-3.65)                    |
| Genital malformation                    | 0.29 (0.12-0.89)                  | 0.09 (0.00-3.80)                   | 0.37 (0.01-2.08)              | 0.13 (0.01-0.63)                       | 0.62 (0.17-2.84)                       | 0.12 (0.01-1.14)               | 0.08 (0.01-1.21)                    |
| Genital tuberculosis                    | 0.13 (0.04-0.70)                  | 0.00 (NaN)                         | 0.31 (0.01-1.92)              | 0.00 (NaN)                             | 0.10 (0.00-2.28)                       | 0.21 (0.06-1.22)               | 0.16 (0.03-1.29)                    |
| <b>STD</b>                              |                                   |                                    |                               |                                        |                                        |                                |                                     |
| Overall                                 | 2.68 (2.24-3.41)                  | 2.11 (0.49-6.76)                   | 0.25 (0.01-1.79)              | 1.93 (1.28-2.88)                       | 1.30 (0.64-3.54)                       | 7.01 (5.72-8.81)               | 0.41 (0.15-1.55)                    |
| Mycoplasma genitalium infection         | 2.16 (1.78-2.84)                  | 1.69 (0.28-6.26)                   | 0.00 (NaN)                    | 1.20 (0.71-1.99)                       | 0.87 (0.40-3.02)                       | 6.36 (5.15-8.09)               | 0.13 (0.01-1.27)                    |
| Condyloma acuminatum                    | 0.14 (0.05-0.71)                  | 0.00 (NaN)                         | 0.25 (0.01-1.79)              | 0.17 (0.02-0.72)                       | 0.00 (NaN)                             | 0.21 (0.03-1.27)               | 0.27 (0.08-1.4)                     |
| Syphilis                                | 0.18 (0.06-0.76)                  | 0.09 (0.00-3.80)                   | 0.00 (NaN)                    | 0.12 (0.01-0.61)                       | 0.33 (0.03-2.57)                       | 0.21 (0.03-1.27)               | 0.04 (0.1-1.7)                      |
| Chlamydia trachomatis genital infection | 0.22 (0.09-0.81)                  | 0.00 (NaN)                         | 0.00 (NaN)                    | 0.46 (0.16-1.09)                       | 0.10 (0.00-2.28)                       | 0.38 (0.04-1.64)               | 0.04 (0.1-1.7)                      |
| Toxoplasma gondii and cytomegalovirus   | 0.11 (0.04-0.68)                  | 0.42 (0.01-4.25)                   | 0.00 (NaN)                    | 0.17 (0.02-0.72)                       | 0.00 (NaN)                             | 0.17 (0.02-1.21)               | 0.08 (0.01-1.21)                    |
| Genital herpes                          | 0.04 (0.01-0.62)                  | 0.00 (NaN)                         | 0.00 (NaN)                    | 0.12 (0.01-0.61)                       | 0.00 (NaN)                             | 0.06 (0.00-1.08)               | 0.04 (0.1-1.7)                      |
| Gonorrhea                               | 0.04 (0.01-0.62)                  | 0.00 (NaN)                         | 0.00 (NaN)                    | 0.06 (0.00-0.51)                       | 0.10 (0.00-2.28)                       | 0.00 (NaN)                     | 0.04 (0.1-1.7)                      |
